# Supplementary material for: Human Aquaporin-5 Facilitates Hydrogen Peroxide Permeation Affecting Adaption to Oxidative Stress and Cancer Cell Migration
Source: MDPI journal article supplement (doi:10.3390/cancers11070932), 2019-07-03
Supplement: s1 [file s1]

# Human aquaporin-5 facilitates hydrogen peroxide permeation affecting adaption to oxidative stress and cancer cell migration

Claudia Rodrigues <sup>1,2</sup>, Catarina Pimpão <sup>1,2</sup>, Andreia F. Mósca <sup>1,2</sup>, Ana S. Coxixo <sup>1,2</sup>, Duarte Lopes <sup>1,2</sup>, Inês Vieira da Silva <sup>1,2</sup>, Per Amstrup Pedersen <sup>3</sup>, Fernando Antunes <sup>4</sup> and Graça Soveral <sup>1,2,\*</sup>

## Supplementary Materials

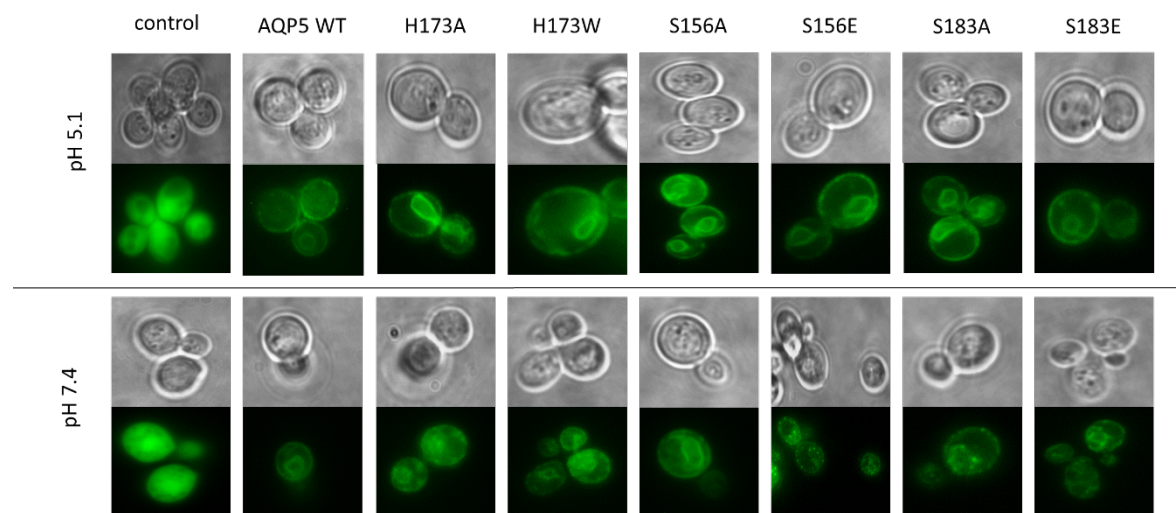

**Figure S1. AQP5 expression and localization in transformed *S. cerevisiae* cells.** Phase contrast (up) and epifluorescence (down) microscopy images (100x objective) of yeast aqy-null cells transformed with empty plasmid pUG35 (control cells with cytosolic GFP localization) and transformed with AQP5 WT and mutants at pH 5.1 (upper panel) and pH 7.4 (lower panel).
